# Supplementary material for: Elevated Platelet to Lymphocyte Ratio Is Associated with Poor Survival Outcomes in Patients with Colorectal Cancer
Source: PLoS One. 2016 Sep 22;11(9):e0163523. doi: 10.1371/journal.pone.0163523 (PMC5033452; doi:10.1371/journal.pone.0163523)
Supplement: S1 File — (PDF) [file pone.0163523.s002.pdf]

# CERTIFICATE OF ENGLISH EDITING

This document certifies that the paper listed below has been edited to ensure that the language is clear and free of errors. The edit was performed by professional editors at Editage, a division of Cactus Communications. The intent of the author's message was not altered in any way during the editing process. The quality of the edit has been guaranteed, with the assumption that our suggested changes have been accepted and have not been further altered without the knowledge of our editors.

## TITLE OF THE PAPER

Elevated Platelet to Lymphocyte Ratio is Associated with Poor Survival Outcomes in Patients with Colorectal Cancer

## AUTHORS

Xiaobin Gu, Xian-Shu Gao, Shangbin Qin, Xiaoying Li, Xin Qi, Mingwei Ma, Hao Yu, Shaoqian Sun, Dong Zhou, Wen Wang, Wei Xiong

## JOB CODE

NSAOZ\_1

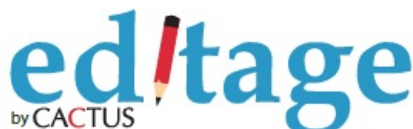

Signature

*Vikas Narang*

Vikas Narang,  
Vice President, Author Services, Editage

Date of Issue  
**July 22, 2016**

Editage, a brand of Cactus Communications, offers professional English language editing and publication support services to authors engaged in over 500 areas of research. Through its community of experienced editors, which includes doctors, engineers, published scientists, and researchers with peer review experience, Editage has successfully helped authors get published in internationally reputed journals. Authors who work with Editage are guaranteed excellent language quality and timely delivery.

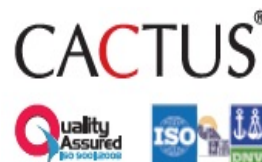

### Contact Editage

|                                                                        |                                                                        |                                                                                          |                                                              |                                                                              |                                                                        |
|------------------------------------------------------------------------|------------------------------------------------------------------------|------------------------------------------------------------------------------------------|--------------------------------------------------------------|------------------------------------------------------------------------------|------------------------------------------------------------------------|
| Worldwide<br>request@editage.com<br>+1 877-334-8243<br>www.editage.com | Japan<br>submissions@editage.com<br>+81 03-6868-3348<br>www.editage.jp | Korea<br>submit-korea@editage.com<br>korea@editage.com<br>1544-9241<br>www.editage.co.kr | China<br>fabiao@editage.cn<br>400-005-6055<br>www.editage.cn | Brazil<br>inquiry.brazil@editage.com<br>0800-892-20-97<br>www.editage.com.br | Taiwan<br>submitjobs@editage.com<br>02 2657 0306<br>www.editage.com.tw |
|------------------------------------------------------------------------|------------------------------------------------------------------------|------------------------------------------------------------------------------------------|--------------------------------------------------------------|------------------------------------------------------------------------------|------------------------------------------------------------------------|
